# Supplementary material
Source: publisher figshare collection journal article supplement (https://tandf.figshare.com/ndownloader/files/17251151)
Supplement: Supplementary file 1 [file 17251151]

## Poor versus rich countries: a gap in public attitudes towards fiscal solidarity in the EU

Sofia Vasilopoulou and Liisa Talving, *Department of Politics, University of York*

### Online Appendices

#### Appendix A1. Descriptive statistics

|                                           | Mean  | SD    | Min   | Max  |
|-------------------------------------------|-------|-------|-------|------|
| Opposition to fiscal solidarity           | 0.47  | 0.50  | 0.0   | 1    |
| Opposition to the EU                      | 0.14  | 0.35  | 0.0   | 1    |
| Economic evaluations                      | 2.79  | 1.01  | 1.0   | 5    |
| Occupation                                | 4.88  | 2.14  | 1.0   | 8    |
| Education                                 | 3.19  | 0.74  | 1.0   | 4    |
| Attachment to the EU                      | 2.82  | 0.94  | 1.0   | 4    |
| Age                                       | 51.06 | 17.92 | 16.0  | 99   |
| Gender                                    | 1.55  | 0.50  | 1.0   | 2    |
| Social class                              | 5.39  | 1.58  | 1.0   | 10   |
| Left-right self-assessment                | 6.08  | 2.63  | 1.0   | 11   |
| Approval of national government           | 1.40  | 0.49  | 1.0   | 2    |
| Attitudes towards domestic redistribution | 4.77  | 2.93  | 1.0   | 11   |
| GDP per capita (2013)                     | 95.74 | 34.66 | 46.0  | 261  |
| Operating budgetary balance (2013)        | 1.28  | 1.84  | -0.49 | 5.08 |
| Bailout country                           | 0.27  | 0.44  | 0.0   | 1    |
| N=30,064                                  |       |       |       |      |

Source: EES Voter Study 2014.

**Appendix A2.** Robustness test using payments from EU budget to measure domestic context (OBB)

|                            |                                         | Model 1            | Model 2            |
|----------------------------|-----------------------------------------|--------------------|--------------------|
| Individual-level variables | Economy a lot worse                     | 0.55***<br>(0.07)  | 0.45***<br>(0.06)  |
|                            | Economy a little worse                  | 0.31***<br>(0.05)  | 0.25***<br>(0.04)  |
|                            | Economy a little better                 | -0.18***<br>(0.05) | -0.20***<br>(0.04) |
|                            | Economy a lot better                    | -0.38***<br>(0.13) | -0.42***<br>(0.13) |
|                            | Self-employed                           | 0.00<br>(0.08)     | 0.01<br>(0.08)     |
|                            | Managers                                | -0.13*<br>(0.08)   | -0.13*<br>(0.08)   |
|                            | Other white collars                     | 0.03<br>(0.07)     | 0.03<br>(0.07)     |
|                            | Manual workers                          | 0.14**<br>(0.06)   | 0.14**<br>(0.06)   |
|                            | House person                            | 0.18**<br>(0.09)   | 0.19**<br>(0.09)   |
|                            | Retired                                 | 0.13*<br>(0.07)    | 0.13*<br>(0.07)    |
|                            | Students                                | -0.01<br>(0.09)    | 0.00<br>(0.09)     |
|                            | No full-time education                  | -0.20<br>(0.17)    | -0.21<br>(0.17)    |
|                            | Medium education                        | -0.17***<br>(0.05) | -0.16***<br>(0.05) |
|                            | High education                          | -0.43***<br>(0.05) | -0.42***<br>(0.05) |
|                            | Not really attached to Europe           | -0.41***<br>(0.06) | -0.42***<br>(0.07) |
|                            | Somewhat attached to Europe             | -0.92***<br>(0.06) | -1.03***<br>(0.07) |
|                            | Definitely attached to Europe           | -1.35***<br>(0.06) | -1.51***<br>(0.07) |
|                            | Age                                     | -0.00<br>(0.00)    | -0.00<br>(0.00)    |
|                            | Female                                  | 0.04<br>(0.03)     | 0.04<br>(0.03)     |
|                            | Social class                            | -0.05***<br>(0.01) | -0.05***<br>(0.01) |
|                            | Left-right                              | 0.07***<br>(0.02)  | 0.08***<br>(0.02)  |
|                            | Left-right <sup>2</sup>                 | -0.00*<br>(0.00)   | -0.00*<br>(0.00)   |
|                            | Approves government's record            | -0.49***<br>(0.04) | -0.49***<br>(0.04) |
|                            | Preferences for domestic redistribution | 0.00<br>(0.01)     | 0.00<br>(0.01)     |
| Country-level variables    | Operating budgetary balance logged      | 0.36***<br>(0.10)  | 0.07<br>(0.11)     |
|                            | Bailout country                         | -0.05<br>(0.19)    | -0.05<br>(0.18)    |
| Cross-level interactions   | Economy a lot worse # OBB               | -0.19***<br>(0.07) | -                  |

|                  |                                     |                   |                   |
|------------------|-------------------------------------|-------------------|-------------------|
|                  | Economy a little worse # OBB        | -0.12**<br>(0.05) | -                 |
|                  | Economy a little better # OBB       | -0.02<br>(0.04)   | -                 |
|                  | Economy a lot better # OBB          | -0.26*<br>(0.15)  | -                 |
|                  | Not really attached to Europe # OBB | -                 | 0.05<br>(0.07)    |
|                  | Somewhat attached to Europe # OBB   | -                 | 0.27***<br>(0.07) |
|                  | Definitely attached to Europe # OBB | -                 | 0.41***<br>(0.07) |
| Constant         |                                     | 0.76***<br>(0.17) | 0.87***<br>(0.17) |
| Observations     |                                     | 19,795            | 19,795            |
| Number of groups |                                     | 28                | 28                |
| Log likelihood   |                                     | -11,964           | -11,940           |

*Source:* EES Voter Study 2014.

*Notes:* Multilevel logistic regression models; respondents nested in countries. Entries are regression coefficients with standard errors in parentheses. Reference categories: economic situation in country stayed the same; unemployed; low education; not at all attached to Europe. \*\*\*  $p < 0.01$ , \*\*  $p < 0.05$ , \*  $p < 0.10$

**Appendix A3.** Robustness tests using unemployment and GDP per capita change to measure domestic context

|                            |                                         | Model 1            | Model 2            | Model 3            | Model 4            |
|----------------------------|-----------------------------------------|--------------------|--------------------|--------------------|--------------------|
| Individual-level variables | Economy a lot worse                     | 1.44***<br>(0.31)  | 0.45***<br>(0.06)  | -4.92*<br>(2.55)   | 0.45***<br>(0.06)  |
|                            | Economy a little worse                  | 0.77***<br>(0.22)  | 0.25***<br>(0.04)  | -2.82<br>(2.03)    | 0.25***<br>(0.04)  |
|                            | Economy a little better                 | -0.30<br>(0.22)    | -0.20***<br>(0.04) | 0.83<br>(2.12)     | -0.20***<br>(0.04) |
|                            | Economy a lot better                    | 1.50*<br>(0.86)    | -0.42***<br>(0.13) | -0.98<br>(7.91)    | -0.41***<br>(0.13) |
|                            | Self-employed                           | 0.01<br>(0.08)     | 0.00<br>(0.08)     | 0.01<br>(0.08)     | 0.00<br>(0.08)     |
|                            | Managers                                | -0.13*<br>(0.08)   | -0.13*<br>(0.08)   | -0.13*<br>(0.08)   | -0.13*<br>(0.08)   |
|                            | Other white collars                     | 0.03<br>(0.07)     | 0.03<br>(0.07)     | 0.03<br>(0.07)     | 0.03<br>(0.07)     |
|                            | Manual workers                          | 0.14**<br>(0.06)   | 0.14**<br>(0.06)   | 0.14**<br>(0.06)   | 0.14**<br>(0.06)   |
|                            | House person                            | 0.19**<br>(0.09)   | 0.20**<br>(0.09)   | 0.19**<br>(0.09)   | 0.19**<br>(0.09)   |
|                            | Retired                                 | 0.13*<br>(0.07)    | 0.12*<br>(0.07)    | 0.13*<br>(0.07)    | 0.13*<br>(0.07)    |
|                            | Students                                | -0.01<br>(0.09)    | -0.01<br>(0.09)    | -0.00<br>(0.09)    | -0.01<br>(0.09)    |
|                            | No full-time education                  | -0.20<br>(0.17)    | -0.18<br>(0.17)    | -0.20<br>(0.17)    | -0.20<br>(0.17)    |
|                            | Medium education                        | -0.17***<br>(0.05) | -0.17***<br>(0.05) | -0.17***<br>(0.05) | -0.17***<br>(0.05) |
|                            | High education                          | -0.43***<br>(0.05) | -0.43***<br>(0.05) | -0.43***<br>(0.05) | -0.43***<br>(0.05) |
|                            | Not really attached to Europe           | -0.41***<br>(0.06) | -1.31***<br>(0.33) | -0.41***<br>(0.06) | 5.71**<br>(2.69)   |
|                            | Somewhat attached to Europe             | -0.92***<br>(0.06) | -2.69***<br>(0.31) | -0.92***<br>(0.06) | 6.34**<br>(2.53)   |
|                            | Definitely attached to Europe           | -1.35***<br>(0.06) | -3.81***<br>(0.34) | -1.35***<br>(0.06) | 9.81***<br>(2.93)  |
|                            | Age                                     | -0.00<br>(0.00)    | -0.00<br>(0.00)    | -0.00<br>(0.00)    | -0.00<br>(0.00)    |
|                            | Female                                  | 0.04<br>(0.03)     | 0.04<br>(0.03)     | 0.04<br>(0.03)     | 0.04<br>(0.03)     |
|                            | Social class                            | -0.05***<br>(0.01) | -0.05***<br>(0.01) | -0.05***<br>(0.01) | -0.05***<br>(0.01) |
|                            | Left-right                              | 0.07***<br>(0.02)  | 0.08***<br>(0.02)  | 0.07***<br>(0.02)  | 0.07***<br>(0.02)  |
|                            | Left-right <sup>2</sup>                 | -0.00<br>(0.00)    | -0.00*<br>(0.00)   | -0.00<br>(0.00)    | -0.00*<br>(0.00)   |
|                            | Approves government's record            | -0.49***<br>(0.04) | -0.48***<br>(0.04) | -0.49***<br>(0.04) | -0.49***<br>(0.04) |
|                            | Preferences for domestic redistribution | 0.00<br>(0.01)     | 0.00<br>(0.01)     | 0.00<br>(0.01)     | 0.00<br>(0.01)     |
| Country-level variables    | Unemployment rate                       | 0.34<br>(0.25)     | -0.43<br>(0.27)    | -                  | -                  |
|                            | GDP per capita change                   | -                  | -                  | 0.57<br>(1.08)     | 2.34**<br>(1.16)   |
|                            | Bailout country                         | 0.05<br>(0.24)     | 0.08<br>(0.24)     | 0.26<br>(0.22)     | 0.27<br>(0.22)     |

|                          |                                               |                    |                   |                  |                    |
|--------------------------|-----------------------------------------------|--------------------|-------------------|------------------|--------------------|
| Cross-level interactions | Economy a lot worse # unemployment            | -0.40***<br>(0.12) | -                 | -                | -                  |
|                          | Economy a little worse # unemployment         | -0.22**<br>(0.09)  | -                 | -                | -                  |
|                          | Economy a little better # unemployment        | 0.05<br>(0.10)     | -                 | -                | -                  |
|                          | Economy a lot better # unemployment           | -0.92**<br>(0.42)  | -                 | -                | -                  |
|                          | Not really attached to Europe # unemployment  | -                  | 0.36***<br>(0.13) | -                | -                  |
|                          | Somewhat attached to Europe # unemployment    | -                  | 0.73***<br>(0.13) | -                | -                  |
|                          | Definitely attached to Europe # unemployment  | -                  | 1.04***<br>(0.14) | -                | -                  |
|                          | Economy a lot worse # GDP pc change           | -                  | -                 | 1.17**<br>(0.56) | -                  |
|                          | Economy a little worse # GDP pc change        | -                  | -                 | 0.67<br>(0.44)   | -                  |
|                          | Economy a little better # GDP pc change       | -                  | -                 | -0.22<br>(0.46)  | -                  |
|                          | Economy a lot better # GDP pc change          | -                  | -                 | 0.12<br>(1.71)   | -                  |
|                          | Not really attached to Europe # GDP pc change | -                  | -                 | -                | -1.34**<br>(0.59)  |
|                          | Somewhat attached to Europe # GDP pc change   | -                  | -                 | -                | -1.59***<br>(0.55) |
|                          | Definitely attached to Europe # GDP pc change | -                  | -                 | -                | -2.43***<br>(0.64) |
| Constant                 |                                               | 0.12<br>(0.58)     | 1.95***<br>(0.63) | -1.76<br>(5.01)  | -9.86*<br>(5.34)   |
| Observations             |                                               | 19,795             | 19,795            | 19,795           | 19,795             |
| Number of groups         |                                               | 28                 | 28                | 28               | 28                 |
| Log likelihood           |                                               | -11,965            | -11,939           | -11,972          | -11,968            |

*Source:* EES Voter Study 2014.

*Notes:* Multilevel logistic regression models; respondents nested in countries. Entries are regression coefficients with standard errors in parentheses. Reference categories: economic situation in country stayed the same; unemployed; low education; not at all attached to Europe. \*\*\* p<0.01, \*\* p<0.05, \* p<0.10

**Appendix A4.** Robustness test using an ordinal variable to measure attitudes towards fiscal solidarity (1 = totally disagree, 4 = totally agree)

|                            |                                         | Model 1            | Model 2            | Model 3            |
|----------------------------|-----------------------------------------|--------------------|--------------------|--------------------|
| Individual-level variables | Economy a lot worse                     | -0.51***<br>(0.05) | 2.57***<br>(0.72)  | -0.51***<br>(0.05) |
|                            | Economy a little worse                  | -0.20***<br>(0.04) | 1.04**<br>(0.49)   | -0.20***<br>(0.04) |
|                            | Economy a little better                 | 0.15***<br>(0.04)  | 0.14<br>(0.51)     | 0.15***<br>(0.04)  |
|                            | Economy a lot better                    | 0.56***<br>(0.10)  | 0.02<br>(1.75)     | 0.56***<br>(0.10)  |
|                            | Self-employed                           | -0.01<br>(0.07)    | -0.01<br>(0.07)    | -0.01<br>(0.07)    |
|                            | Managers                                | 0.10<br>(0.06)     | 0.09<br>(0.06)     | -0.09<br>(0.06)    |
|                            | Other white collars                     | -0.07<br>(0.06)    | -0.07<br>(0.06)    | -0.07<br>(0.06)    |
|                            | Manual workers                          | -0.13**<br>(0.06)  | -0.13**<br>(0.06)  | -0.12**<br>(0.06)  |
|                            | House person                            | -0.16**<br>(0.08)  | -0.16**<br>(0.08)  | -0.16**<br>(0.08)  |
|                            | Retired                                 | -0.10<br>(0.06)    | -0.10<br>(0.06)    | -0.09<br>(0.06)    |
|                            | Students                                | -0.02<br>(0.08)    | -0.02<br>(0.08)    | -0.03<br>(0.08)    |
|                            | No full-time education                  | 0.30**<br>(0.15)   | 0.30**<br>(0.15)   | 0.30**<br>(0.15)   |
|                            | Medium education                        | 0.18***<br>(0.04)  | 0.17***<br>(0.04)  | 0.17***<br>(0.04)  |
|                            | High education                          | 0.42***<br>(0.05)  | 0.42***<br>(0.05)  | 0.41***<br>(0.05)  |
|                            | Not really attached to Europe           | 0.56***<br>(0.05)  | 0.56***<br>(0.05)  | 0.17<br>(0.81)     |
|                            | Somewhat attached to Europe             | 1.04***<br>(0.05)  | 1.03***<br>(0.05)  | -2.20***<br>(0.74) |
|                            | Definitely attached to Europe           | 1.54***<br>(0.06)  | 1.54***<br>(0.06)  | -3.18***<br>(0.77) |
|                            | Age                                     | 0.00<br>(0.00)     | 0.00<br>(0.00)     | 0.00<br>(0.00)     |
|                            | Female                                  | -0.07**<br>(0.03)  | -0.06**<br>(0.03)  | -0.07**<br>(0.03)  |
|                            | Social class                            | 0.05***<br>(0.01)  | 0.05***<br>(0.01)  | 0.05***<br>(0.01)  |
|                            | Left-right                              | -0.07***<br>(0.02) | -0.07***<br>(0.02) | -0.07***<br>(0.02) |
|                            | Left-right <sup>2</sup>                 | 0.00<br>(0.00)     | 0.00<br>(0.00)     | 0.00*<br>(0.00)    |
|                            | Approves government's record            | 0.42***<br>(0.03)  | 0.42***<br>(0.03)  | 0.41***<br>(0.03)  |
|                            | Preferences for domestic redistribution | -0.01<br>(0.01)    | -0.01<br>(0.01)    | -0.00<br>(0.01)    |
| Country-level variables    | GDP per capita logged                   | 0.42*<br>(0.24)    | 0.55**<br>(0.24)   | -0.26<br>(0.28)    |
|                            | Bailout country                         | -0.09<br>(0.19)    | -0.08<br>(0.18)    | -0.09<br>(0.19)    |
| Cross-level interactions   | Economy a lot worse # GDP               | -<br>(0.16)        | -0.70***<br>(0.16) | -                  |

|                                     |                   |                   |                   |
|-------------------------------------|-------------------|-------------------|-------------------|
| Economy a little worse # GDP        | -                 | -0.27**<br>(0.11) | -                 |
| Economy a little better # GDP       | -                 | 0.00<br>(0.11)    | -                 |
| Economy a lot better # GDP          | -                 | 0.11<br>(0.38)    | -                 |
| Not really attached to Europe # GDP | -                 | -                 | 0.09<br>(0.18)    |
| Somewhat attached to Europe # GDP   | -                 | -                 | 0.72***<br>(0.17) |
| Definitely attached to Europe # GDP | -                 | -                 | 1.05***<br>(0.17) |
| Observations                        | 19,795            | 19,795            | 19,795            |
| Number of groups                    | 28                | 28                | 28                |
| Log likelihood                      | -23.554           | -23.543           | -23.517           |
| Country-level variance              | 0.18***<br>(0.05) | 0.17***<br>(0.05) | 0.18***<br>(0.05) |
| Cut 1                               | 1.47<br>(1.12)    | 2.06*<br>(1.12)   | -1.59<br>(1.31)   |
| Cut 2                               | 2.93***<br>(1.12) | 3.52***<br>(1.12) | -0.13<br>(1.31)   |
| Cut 3                               | 5.36***<br>(1.12) | 5.95***<br>(1.12) | 2.31*<br>(1.31)   |

*Source:* EES Voter Study 2014.

*Notes:* Multilevel ordered logit regression models; respondents nested in countries. Entries are regression coefficients with standard errors in parentheses. Reference categories: economic situation in country stayed the same; unemployed; low education; not at all attached to Europe. \*\*\* p<0.01, \*\* p<0.05, \* p<0.10

**Appendix A5.** Robustness test using egocentric measures of the utilitarian dimension, i.e. education and occupation

|                            |                                         | Model 1            | Model 2            |
|----------------------------|-----------------------------------------|--------------------|--------------------|
| Individual-level variables | Economy a lot worse                     | 0.44***<br>(0.06)  | 0.44***<br>(0.06)  |
|                            | Economy a little worse                  | 0.25***<br>(0.04)  | 0.25***<br>(0.04)  |
|                            | Economy a little better                 | -0.19***<br>(0.04) | -0.20***<br>(0.04) |
|                            | Economy a lot better                    | -0.40***<br>(0.13) | -0.40***<br>(0.13) |
|                            | Self-employed                           | 0.93<br>(1.16)     | 0.01<br>(0.08)     |
|                            | Managers                                | 1.14<br>(1.06)     | -0.13*<br>(0.08)   |
|                            | Other white collars                     | -0.10<br>(1.03)    | 0.03<br>(0.07)     |
|                            | Manual workers                          | 0.54<br>(0.93)     | 0.14**<br>(0.06)   |
|                            | House person                            | -1.13<br>(1.29)    | 0.19**<br>(0.09)   |
|                            | Retired                                 | -0.77<br>(0.88)    | 0.13*<br>(0.07)    |
|                            | Students                                | 4.02***<br>(1.32)  | -0.02<br>(0.09)    |
|                            | No full-time education                  | -0.21<br>(0.17)    | -1.67<br>(2.59)    |
|                            | Medium education                        | -0.16***<br>(0.05) | 1.14*<br>(0.68)    |
|                            | High education                          | -0.43***<br>(0.05) | 2.62***<br>(0.71)  |
|                            | Not really attached to Europe           | -0.40***<br>(0.06) | -0.40***<br>(0.06) |
|                            | Somewhat attached to Europe             | -0.92***<br>(0.06) | -0.92***<br>(0.06) |
|                            | Definitely attached to Europe           | -1.35***<br>(0.06) | -1.34***<br>(0.06) |
|                            | Age                                     | -0.00<br>(0.00)    | -0.00<br>(0.00)    |
|                            | Female                                  | 0.04<br>(0.03)     | 0.04<br>(0.03)     |
|                            | Social class                            | -0.05***<br>(0.01) | -0.05***<br>(0.01) |
|                            | Left-right                              | 0.07***<br>(0.02)  | 0.08***<br>(0.02)  |
|                            | Left-right <sup>2</sup>                 | -0.00<br>(0.00)    | -0.00*<br>(0.00)   |
|                            | Approves government's record            | -0.49***<br>(0.04) | -0.49***<br>(0.04) |
|                            | Preferences for domestic redistribution | 0.00<br>(0.01)     | 0.00<br>(0.01)     |
| Country-level variables    | GDP per capita logged                   | -0.54*<br>(0.30)   | -0.17<br>(0.28)    |
|                            | Bailout country                         | 0.05<br>(0.20)     | 0.06<br>(0.19)     |
| Cross-level interactions   | Self-employed # GDP                     | -0.20<br>(0.26)    | -                  |



|                  |                              |                    |                    |
|------------------|------------------------------|--------------------|--------------------|
|                  | Managers # GDP               | -0.28<br>(0.23)    | -                  |
|                  | Other white collars # GDP    | 0.03<br>(0.23)     | -                  |
|                  | Manual workers # GDP         | -0.09<br>(0.21)    | -                  |
|                  | House person # GDP           | 0.29<br>(0.29)     | -                  |
|                  | Retired # GDP                | 0.20<br>(0.20)     | -                  |
|                  | Students # GDP               | -0.90***<br>(0.29) | -                  |
|                  | No full-time education # GDP | -                  | 0.31<br>(0.56)     |
|                  | Medium education # GDP       | -                  | -0.29*<br>(0.15)   |
|                  | High education # GDP         | -                  | -0.67***<br>(0.16) |
| Constant         |                              | 3.37**<br>(1.38)   | 1.68<br>(1.28)     |
| Observations     |                              | 19,795             | 19,795             |
| Number of groups |                              | 28                 | 28                 |
| Log likelihood   |                              | -11,960            | -11,962            |

*Source:* EES Voter Study 2014.

*Notes:* Multilevel logistic regression models; respondents nested in countries. Entries are regression coefficients with standard errors in parentheses. Reference categories: economic situation in country stayed the same; unemployed; low education; not at all attached to Europe. \*\*\*  $p < 0.01$ , \*\*  $p < 0.05$ , \*  $p < 0.10$

**Appendix A6.** Robustness test using an alternative dependent variable, i.e. opposition to EU membership

|                            |                                         | Model 1            | Model 2            |
|----------------------------|-----------------------------------------|--------------------|--------------------|
| Individual-level variables | Economy a lot worse                     | -1.03<br>(1.10)    | 0.69***<br>(0.07)  |
|                            | Economy a little worse                  | 1.03<br>(0.90)     | 0.29***<br>(0.06)  |
|                            | Economy a little better                 | 1.40<br>(1.11)     | -0.11<br>(0.07)    |
|                            | Economy a lot better                    | 5.56<br>(3.71)     | 0.28<br>(0.19)     |
|                            | Self-employed                           | -0.10<br>(0.11)    | -0.10<br>(0.11)    |
|                            | Managers                                | -0.39***<br>(0.12) | -0.40***<br>(0.12) |
|                            | Other white collars                     | -0.25**<br>(0.10)  | -0.26**<br>(0.10)  |
|                            | Manual workers                          | -0.04<br>(0.09)    | -0.04<br>(0.09)    |
|                            | House person                            | -0.05<br>(0.12)    | -0.05<br>(0.12)    |
|                            | Retired                                 | -0.05<br>(0.10)    | -0.04<br>(0.10)    |
|                            | Students                                | 0.04<br>(0.14)     | 0.03<br>(0.14)     |
|                            | No full-time education                  | -0.13<br>(0.22)    | -0.13<br>(0.22)    |
|                            | Medium education                        | -0.17**<br>(0.07)  | -0.18***<br>(0.07) |
|                            | High education                          | -0.35***<br>(0.08) | -0.35***<br>(0.08) |
|                            | Not really attached to Europe           | -1.03***<br>(0.06) | -1.91*<br>(0.99)   |
|                            | Somewhat attached to Europe             | -2.14***<br>(0.07) | -1.45<br>(1.01)    |
|                            | Definitely attached to Europe           | -2.77***<br>(0.09) | 1.24<br>(1.24)     |
|                            | Age                                     | -0.00<br>(0.00)    | -0.00<br>(0.00)    |
|                            | Female                                  | -0.12**<br>(0.05)  | -0.11**<br>(0.05)  |
|                            | Social class                            | -0.06***<br>(0.02) | -0.06***<br>(0.02) |
|                            | Left-right                              | -0.17***<br>(0.03) | -0.17***<br>(0.03) |
|                            | Left-right <sup>2</sup>                 | 0.01***<br>(0.00)  | 0.01***<br>(0.00)  |
|                            | Approves government's record            | -0.79***<br>(0.06) | -0.79***<br>(0.06) |
|                            | Preferences for domestic redistribution | 0.00<br>(0.01)     | 0.00<br>(0.01)     |
| Country-level variables    | GDP per capita logged                   | 0.98***<br>(0.28)  | 1.06***<br>(0.30)  |
|                            | Bailout country                         | 0.11<br>(0.20)     | 0.11<br>(0.20)     |
| Cross-level interactions   | Economy a lot worse # GDP               | 0.39<br>(0.25)     | -                  |

|                  |                                     |                    |                    |
|------------------|-------------------------------------|--------------------|--------------------|
|                  | Economy a little worse # GDP        | -0.16<br>(0.20)    | -                  |
|                  | Economy a little better # GDP       | -0.33<br>(0.24)    | -                  |
|                  | Economy a lot better # GDP          | -1.13<br>(0.80)    | -                  |
|                  | Not really attached to Europe # GDP | -                  | 0.19<br>(0.22)     |
|                  | Somewhat attached to Europe # GDP   | -                  | -0.15<br>(0.22)    |
|                  | Definitely attached to Europe # GDP | -                  | -0.88***<br>(0.27) |
| Constant         |                                     | -3.60***<br>(1.30) | -3.93***<br>(1.38) |
| Observations     |                                     | 19,794             | 19,794             |
| Number of groups |                                     | 28                 | 28                 |
| Log Likelihood   |                                     | -6,332             | -6,327             |

*Source:* EES Voter Study 2014.

*Notes:* Multilevel logistic regression model; respondents nested in countries. Entries are regression coefficients with standard errors in parentheses. Reference categories: economic situation in country stayed the same; unemployed; low education; not at all attached to Europe. \*\*\*  $p < 0.01$ , \*\*  $p < 0.05$ , \*  $p < 0.10$
